# Supplementary material
Source: PubMed Central journal article supplement (PMC3546224)
Supplement: NIHMS406778-supplement-1.pdf [file NIHMS406778-supplement-1.pdf]

1 **Supplementary Information**

2 Modification of residue 42 of the active site loop with a lysine-mimetic sidechain rescues  
 3 isochorismate-pyruvate lyase activity in *Pseudomonas aeruginosa* PchB

4 Jose Olucha, Kathleen M. Meneely and Audrey L. Lamb

5

6 **Table S1: Catalytic constants of all controls and variants**

|                 | sample  | $K_m$ ( $\mu\text{M}$ ) | $k_{cat}$ ( $\times 10^{-3} \text{ s}^{-1}$ ) | $k_{cat}/K_m$ ( $\text{M}^{-1} \text{ s}^{-1}$ ) |
|-----------------|---------|-------------------------|-----------------------------------------------|--------------------------------------------------|
| WT <sup>a</sup> | control | 1.1 $\pm$ 0.1           | 130 $\pm$ 0                                   | 124,000 $\pm$ 4,000                              |
|                 | EtA     | 5.90 $\pm$ 0.03         | 232 $\pm$ 4                                   | 39,200 $\pm$ 500                                 |
|                 | PrA     | 8.2 $\pm$ 0.2           | 168 $\pm$ 1                                   | 20,500 $\pm$ 700                                 |
| K42A            | control | 30 $\pm$ 1              | 45 $\pm$ 1                                    | 1,510 $\pm$ 30                                   |
|                 | EtA     | 48 $\pm$ 1              | 98 $\pm$ 1                                    | 2,060 $\pm$ 20                                   |
|                 | PrA     | 60 $\pm$ 1              | 83 $\pm$ 1                                    | 1,370 $\pm$ 10                                   |
| WT <sup>b</sup> | control | 1.39 $\pm$ 0.03         | 178 $\pm$ 1                                   | 128,000 $\pm$ 3,000                              |
|                 | BrEA    | 3.13 $\pm$ 0.02         | 166 $\pm$ 1                                   | 52,900 $\pm$ 600                                 |
|                 | BrEtOH  | 1.58 $\pm$ 0.02         | 167 $\pm$ 0                                   | 106,000 $\pm$ 1,000                              |
| K42C            | control | 134 $\pm$ 1             | 8.28 $\pm$ 0.04                               | 61.6 $\pm$ 0.3                                   |
|                 | BrEA    | 23 $\pm$ 1              | 94.6 $\pm$ 0.1                                | 4,200 $\pm$ 100                                  |
|                 | BrEtOH  | 125 $\pm$ 1             | 18.4 $\pm$ 0.1                                | 147 $\pm$ 0                                      |
| C7A/K42C        | control | 123 $\pm$ 2             | 8.96 $\pm$ 0.01                               | 65 $\pm$ 1                                       |
|                 | BrEA    | 15.6 $\pm$ 0.3          | 105 $\pm$ 1                                   | 6,700 $\pm$ 100                                  |
|                 | BrEtOH  | 114 $\pm$ 2             | 12.8 $\pm$ 0                                  | 103 $\pm$ 1                                      |
| C07A            | control | 2.10 $\pm$ 0.02         | 200 $\pm$ 10                                  | 93,000 $\pm$ 5,000                               |
|                 | BrEA    | 1.59 $\pm$ 0.03         | 190 $\pm$ 10                                  | 120,000 $\pm$ 9,000                              |
|                 | BrEtOH  | 1.73 $\pm$ 0.07         | 190 $\pm$ 10                                  | 109,000 $\pm$ 9,000                              |

7 <sup>a</sup> exogenous amine conditions <sup>b</sup> covalent rescue conditions

1 **Figure S1. Circular dichroism of PchB-variants and PchB-variants modified with**  
2 **bromoethylamine.** All traces show that the protein is predominantly  $\alpha$ -helical, despite mutation  
3 or modification with bromoethylamine. ● = wildtype PchB; ○ = wildtype PchB modified with  
4 bromoethylamine; ■ = C7A-PchB; □ = C7A-PchB modified with bromoethylamine; ◆ =  
5 K42C-PchB; ◇ = K42C-PchB modified with bromoethylamine; ▲ = C7A,K42C-PchB; △ =  
6 C7A,K42C-PchB modified with bromoethylamine

7

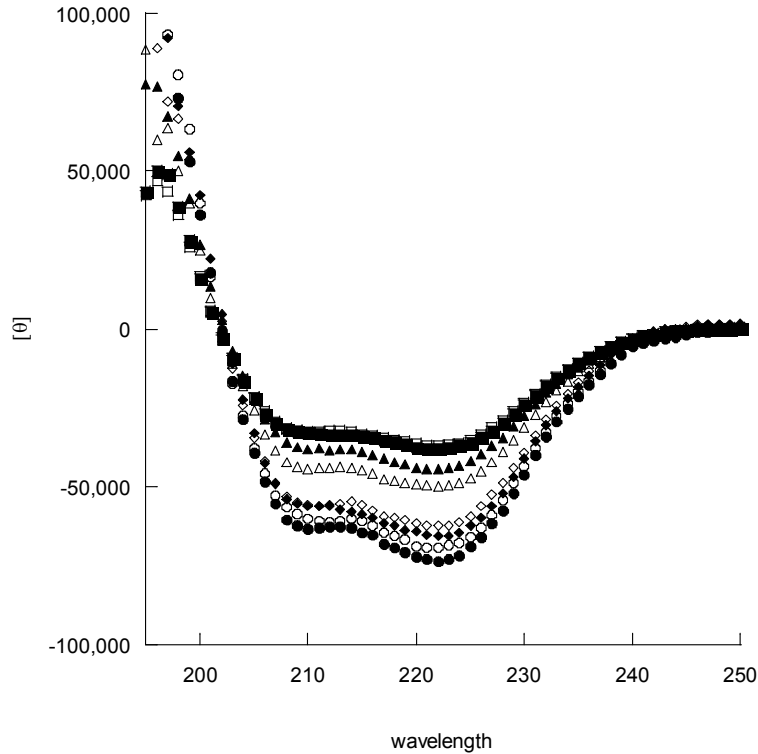

1 **Figure S2:** Lack of activation of K42A-PchB by added propylamine. Concentrations of  
 2 propylamine ( $\triangle$ ) are: 1, 5, 25, 50, and 100 mM (isochorismate constant at 50  $\mu$ M).  
 3 Concentrations of isochorismate ( $\square$ ) are: 1.6, 3.2, 6.3 and 12.5  $\mu$ M mM (propylamine constant  
 4 at 500 mM), plotted as found in reference (1). The calculations are generated based on the work  
 5 of Richard and colleagues (1, 2). On the right is a comparison plot generated like those found in  
 6 Go *et al.* (2), which highlights that in the case of PchB the connection energy is larger than the  
 7 overall stabilization in the transition state between the K42A variant and wildtype.

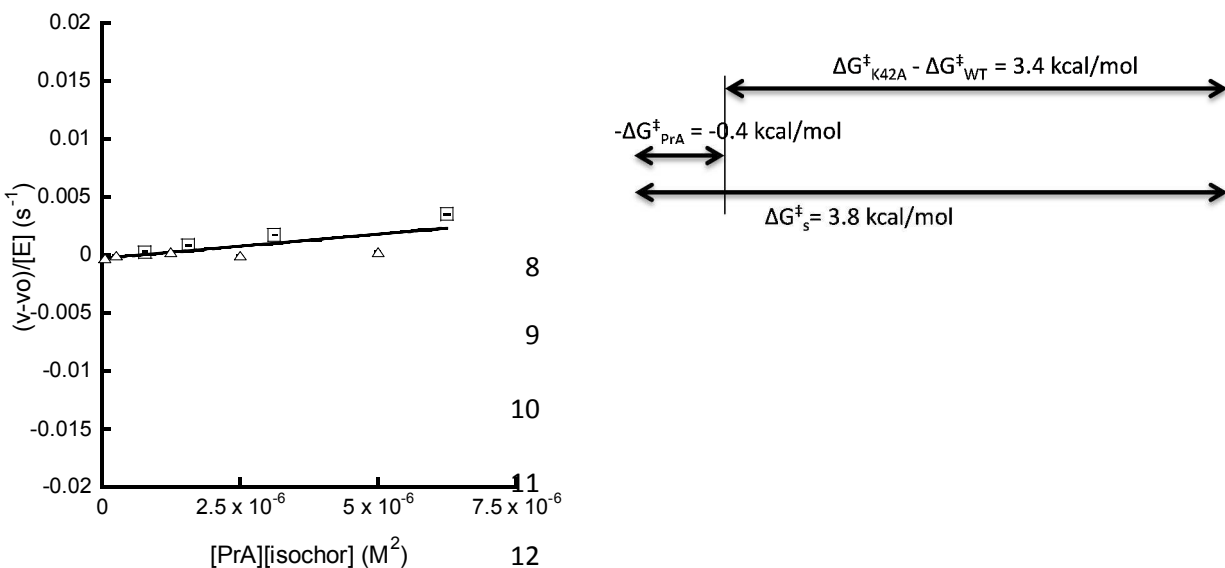

- 13 1.  $k_{cat}/K_m K_d = \text{slope of line} = 420 \text{ M}^{-2} \text{ s}^{-1}$   
 14  
 15 2.  $\frac{k_{cat}/K_m K_d}{(k_{cat}/K_m)_{K42A}} = \frac{420 \text{ M}^{-2} \text{ s}^{-1}}{850 \text{ M}^{-1} \text{ s}^{-1}} = \mathbf{0.5 \text{ M}^{-1}} = \frac{1}{K_d^\ddagger}$   
 16  
 17 3.  $\Delta G_{PrA}^\ddagger = -RT \ln\left(\frac{1}{K_d^\ddagger}\right) = -(1.98 \text{ cal K}^{-1} \text{ mol}^{-1})(298 \text{ K}) \ln(0.5 \text{ M}^{-1}) = \mathbf{0.4 \text{ kcal mol}^{-1}}$   
 18  
 19 4.  $\frac{(k_{cat}/K_m)_{WT}}{k_{cat}/K_m K_d} = \frac{258,000 \text{ M}^{-1} \text{ s}^{-1}}{420 \text{ M}^{-2} \text{ s}^{-1}} = \mathbf{610 \text{ M}}$  = Effective molarity (EM) of the Lys42 sidechain  
 20  
 21 5.  $\Delta G_S^\ddagger = RT \ln(EM) = (1.98 \text{ cal K}^{-1} \text{ mol}^{-1})(298 \text{ K}) \ln(610 \text{ M}) = \mathbf{3.8 \text{ kcal mol}^{-1}}$   
 22  
 23 6.  $\frac{(k_{cat}/K_m)_{WT}}{(k_{cat}/K_m)_{K42A}} = \frac{258,000 \text{ M}^{-1} \text{ s}^{-1}}{850 \text{ M}^{-1} \text{ s}^{-1}} = \mathbf{300}$  or  $\frac{EM}{K_d^\ddagger} = \mathbf{300}$   
 24  
 25 7.  $\Delta G_{K42A}^\ddagger - \Delta G_{WT}^\ddagger = RT \ln\left(\frac{EM}{K_d^\ddagger}\right) = RT \ln(300) = \mathbf{3.4 \text{ kcal mol}^{-1}}$   
 26  
 27 8.  $\Delta G_{K42A}^\ddagger - \Delta G_{WT}^\ddagger = \Delta G_S^\ddagger - \Delta G_{PrA}^\ddagger$   
 or  $\mathbf{3.4 \text{ kcal mol}^{-1} = 3.8 \text{ kcal mol}^{-1} - 0.4 \text{ kcal mol}^{-1}}$

1

2 **References**

- 3 1. Barnett, S. A., Amyes, T. L., Wood, B. M., Gerlt, J. A., and Richard, J. P. (2010)  
4 Activation of R235A mutant orotidine 5'-monophosphate decarboxylase by the  
5 guanidinium cation: effective molarity of the cationic side chain of Arg-235,  
6 *Biochemistry* 49, 824-826.
- 7 2. Go, M. K., Amyes, T. L., and Richard, J. P. (2010) Rescue of K12G triosephosphate  
8 isomerase by ammonium cations: the reaction of an enzyme in pieces, *J. Am. Chem. Soc.*  
9 *132*, 13525-13532.

10

11
